# Supplementary material for: Spatial patterns of organic matter content in the surface soil of the salt marshes of the Venice Lagoon (Italy)
Source: Copernicus journal article supplement (doi:10.5194/bg-21-2937-2024), 2024-06-18
Supplement: Supplementary file 1 [file bg-21-2937-2024-supplement.pdf]

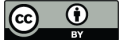

*Supplement of*

## **Spatial patterns of organic matter content in the surface soil of the salt marshes of the Venice Lagoon (Italy)**

**Alice Puppini et al.**

*Correspondence to:* Alice Puppini (alice.puppini@unipd.it)

The copyright of individual parts of the supplement might differ from the article licence.

### S 1. Preliminary investigation on organic matter variability at the marsh scale – replicates at SF\_0 transect

We conducted coring in three replicates at San Felice marsh to observe variability in organic content among the replicates. Along three 30-m-long parallel transects, spaced one meter apart, we collected a total of 18 cores, extending from the marsh edge to the inner area. The spacing between cores within each transect was consistent with the methodology used in the study (0, 2.5, 5, 10, 20, 30 m). Our observations revealed that organic matter (OM) variability along the transects was double that observed between replicates, with the average standard deviation along transects relative to the mean value being about 30%, compared to about 15% between replicates.

| <b>Transect</b> | <b>mean</b> | <b>std</b> | <b>%</b> |
|-----------------|-------------|------------|----------|
| <b>SF_0_1</b>   | 0.084       | 0.039      | 46.61    |
| <b>SF_0_2</b>   | 0.057       | 0.015      | 26.84    |
| <b>SF_0_3</b>   | 0.065       | 0.016      | 24.81    |

**Table S 1. Preliminary investigation on organic matter variability at the marsh scale – replicates at SF\_0 transect. Variability along the transect.**

| <b>Distance from the edge (m)</b> | <b>mean</b> | <b>std</b> | <b>%</b> |
|-----------------------------------|-------------|------------|----------|
| <b>0</b>                          | 0.039       | 0.004      | 10.74    |
| <b>2.5</b>                        | 0.056       | 0.011      | 20.24    |
| <b>5</b>                          | 0.062       | 0.007      | 11.77    |
| <b>10</b>                         | 0.109       | 0.038      | 34.91    |
| <b>20</b>                         | 0.084       | 0.014      | 16.47    |
| <b>30</b>                         | 0.062       | 0.001      | 2.34     |

**Table S 2. Preliminary investigation on organic matter variability at the marsh scale – replicates at SF\_0 transect. Variability between replicates at the same distance from the edge.**

## S 2. Results of the vegetation survey and literature biomass data

| Site | <i>Inula crithmoides</i> | <i>Aster tripolium</i> | <i>Limonium narbonense</i> | <i>Salicornia veneta</i> | <i>Sarcocornia fruticosa</i> | <i>Spartina maritima</i> | <i>Halimione portulacoides</i> | <i>Suaeda maritima</i> | <i>Puccinellia palustris</i> | <i>Juncus maritimus</i> | <i>Phragmites australis</i> | <i>Triglochin maritima</i> | Soil (%) |
|------|--------------------------|------------------------|----------------------------|--------------------------|------------------------------|--------------------------|--------------------------------|------------------------|------------------------------|-------------------------|-----------------------------|----------------------------|----------|
| SF1  |                          |                        | +                          |                          | 3                            |                          | 3                              |                        |                              |                         |                             |                            | 0        |
| SF2  |                          |                        | +                          |                          | 4                            |                          |                                |                        |                              | 3                       |                             |                            | 0        |
| SF3  |                          |                        |                            |                          | 2                            |                          |                                |                        |                              | 4                       |                             |                            | 0        |
| SF4  |                          |                        |                            |                          | 1                            |                          |                                |                        |                              | 1                       |                             |                            | 0        |
| SF5  |                          |                        | 1                          |                          | 3                            |                          |                                |                        |                              | 3                       |                             |                            | 0        |
| SF6  |                          |                        | 3                          | 2                        |                              |                          |                                |                        |                              |                         |                             |                            | 15       |
| CO1  | 3                        |                        | +                          |                          | 3                            |                          |                                |                        |                              |                         |                             |                            | 0        |
| CO2  | 3                        | +                      | +                          |                          | 3                            |                          |                                | 1                      |                              |                         |                             |                            | 0        |
| CO3  |                          |                        |                            |                          | 4                            |                          | 2                              | 2                      |                              |                         |                             |                            | 0        |
| CO4  |                          |                        |                            |                          |                              |                          | 1                              | 1                      |                              |                         |                             |                            | 0        |
| CO5  |                          | +                      |                            |                          | 3                            |                          |                                | 4                      | +                            |                         |                             |                            | 0        |
| CO6  |                          |                        |                            |                          | 1                            |                          | 2                              | +                      |                              |                         |                             |                            | 0        |
| SE1  | 4                        |                        |                            |                          | 2                            |                          |                                |                        |                              |                         |                             |                            | 20       |
| SE2  |                          |                        | 2                          |                          | 4                            |                          |                                |                        | +                            |                         |                             |                            | 10       |
| SE3  |                          |                        | 2                          |                          | 4                            |                          |                                |                        |                              |                         |                             |                            | 20       |
| SE4  |                          |                        | 3                          |                          | 2                            |                          |                                |                        |                              |                         |                             |                            | 20       |
| SE5  |                          |                        |                            |                          | 1                            |                          |                                |                        |                              |                         |                             |                            | 5        |
| SE6  |                          |                        | 1                          |                          | 1                            |                          |                                |                        |                              |                         |                             |                            | 5        |
| PA1  |                          | 1                      |                            |                          |                              |                          |                                |                        |                              |                         | 1                           |                            | 15       |
| PA2  |                          | 1                      |                            |                          |                              |                          |                                |                        |                              |                         | 1                           |                            | 15       |
| PA3  |                          | 1                      |                            |                          |                              |                          |                                |                        |                              |                         | 1                           |                            | 5        |
| PA4  |                          | 1                      |                            |                          |                              |                          |                                |                        |                              |                         | 1                           |                            | 5        |
| PA5  |                          | 1                      |                            |                          |                              |                          |                                |                        |                              | 3                       | 3                           |                            | 0        |
| PA6  |                          | 1                      |                            |                          |                              |                          | +                              |                        |                              | 2                       | 4                           |                            | 0        |
| SA1  |                          |                        | 1                          |                          | 1                            | 1                        |                                |                        |                              |                         |                             |                            | 10       |
| SA2  |                          |                        |                            |                          | 1                            |                          |                                |                        | 1                            |                         |                             |                            | 0        |
| SA3  |                          |                        |                            |                          | 1                            |                          |                                |                        |                              |                         |                             |                            | 0        |
| SA4  |                          |                        | 1                          |                          | 1                            |                          |                                |                        | 1                            |                         |                             |                            | 0        |
| SA5  |                          |                        | +                          | 1                        | 2                            |                          |                                |                        | 2                            |                         |                             |                            | 25       |
| SA6  |                          |                        | +                          | 1                        |                              |                          |                                |                        | 3                            |                         |                             |                            | 50       |
| CV1  | 2                        |                        | 1                          | 3                        |                              |                          |                                | 1                      | 2                            |                         |                             |                            | 5        |
| CV2  |                          |                        | +                          |                          | 1                            | 1                        |                                |                        | 1                            |                         |                             |                            | 0        |

| Site | <i>Inula crithmoides</i> | <i>Aster tripolium</i> | <i>Limonium narbonense</i> | <i>Salicornia veneta</i> | <i>Sarcocornia fruticosa</i> | <i>Spartina maritima</i> | <i>Halimione portulacoides</i> | <i>Suaeda maritima</i> | <i>Puccinellia palustris</i> | <i>Juncus maritimus</i> | <i>Phragmites australis</i> | <i>Triglochin maritima</i> | Soil (%) |
|------|--------------------------|------------------------|----------------------------|--------------------------|------------------------------|--------------------------|--------------------------------|------------------------|------------------------------|-------------------------|-----------------------------|----------------------------|----------|
| CV3  |                          |                        | 1                          |                          | 4                            | 1                        |                                |                        | 1                            |                         |                             |                            | 0        |
| CV4  |                          |                        | 4                          |                          | 2                            | 1                        |                                |                        | 1                            |                         |                             |                            | 0        |
| CV5  |                          |                        | 3                          | 1                        |                              | 1                        |                                | +                      |                              | 2                       |                             |                            | 25       |
| CV6  |                          |                        | 3                          |                          | 1                            |                          |                                |                        | 1                            | 2                       |                             |                            | 0        |
| FO1  |                          |                        |                            |                          | 2                            |                          |                                | 4                      |                              |                         |                             |                            | 0        |
| FO2  |                          |                        |                            | 2                        | 3                            |                          |                                | 2                      | +                            |                         |                             |                            | 0        |
| FO3  |                          |                        |                            |                          | 1                            | +                        |                                | 1                      | 1                            |                         |                             |                            | 0        |
| FO4  |                          |                        | 1                          |                          | 4                            | 1                        |                                | 1                      | 1                            |                         |                             |                            | 0        |
| FO5  |                          |                        | 1                          | 1                        | 3                            | 1                        |                                |                        | 2                            | 1                       |                             |                            | 5        |
| FO6  |                          |                        | 1                          | 1                        | 2                            |                          |                                |                        | 2                            |                         |                             |                            | 10       |
| MI1  |                          |                        | 1                          |                          | 2                            |                          | 1                              |                        |                              | 1                       | 2                           |                            | 0        |
| MI2  |                          | 1                      | 1                          |                          | 2                            |                          | 1                              |                        |                              | 2                       | 1                           |                            | 0        |
| MI3  |                          | 1                      | 4                          | 1                        | 1                            |                          |                                |                        |                              | 1                       | 1                           |                            | 0        |
| MI4  |                          | 1                      | 1                          |                          |                              |                          |                                |                        | 1                            |                         |                             |                            | 5        |
| MI5  |                          | 1                      | 1                          |                          |                              |                          |                                |                        | 1                            |                         |                             |                            | 5        |
| MI6  |                          | 1                      | 1                          |                          |                              |                          |                                |                        | 1                            |                         |                             |                            | 10       |
| CA1  |                          |                        | 1                          |                          | 4                            |                          |                                |                        |                              |                         |                             |                            | 20       |
| CA2  |                          |                        | 4                          |                          | 1                            | 1                        |                                |                        |                              |                         |                             | 1                          | 5        |
| CA3  |                          |                        | 1                          |                          | 4                            |                          |                                |                        | 1                            |                         |                             |                            | 5        |
| CA4  |                          |                        |                            |                          | 1                            |                          |                                |                        | 1                            |                         |                             |                            | 0        |
| CA5  |                          |                        | 4                          |                          | 2                            |                          |                                |                        |                              |                         |                             |                            | 10       |
| CA6  |                          |                        | 4                          |                          |                              |                          |                                |                        | 1                            |                         |                             |                            | 10       |
| VB1  |                          | 1                      | 2                          |                          | 1                            |                          |                                |                        | 1                            | 2                       |                             |                            | 25       |
| VB2  |                          |                        |                            |                          | 2                            |                          |                                |                        |                              | 4                       |                             |                            | 5        |
| VB3  |                          |                        | 1                          |                          | 2                            |                          |                                |                        | 1                            | 2                       |                             | 1                          | 10       |
| VB4  |                          |                        | 2                          |                          | 2                            |                          |                                |                        | 1                            | 2                       |                             |                            | 10       |
| VB5  |                          | 2                      | 1                          |                          |                              |                          |                                |                        | 3                            | 1                       |                             |                            | 10       |
| VB6  |                          |                        | 1                          |                          | 2                            |                          |                                |                        | 1                            | 3                       |                             |                            | 5        |

Table S 3. Vegetation survey. Species composition at each studied site following Braun-Blanquet cover-abundance scale (5 = 75-100 %; 4 = 50-75 %; 3 = 25-50 %; 2 = 5-25 %; 1 < 5 % numerous individuals; + < 5 % few individuals).

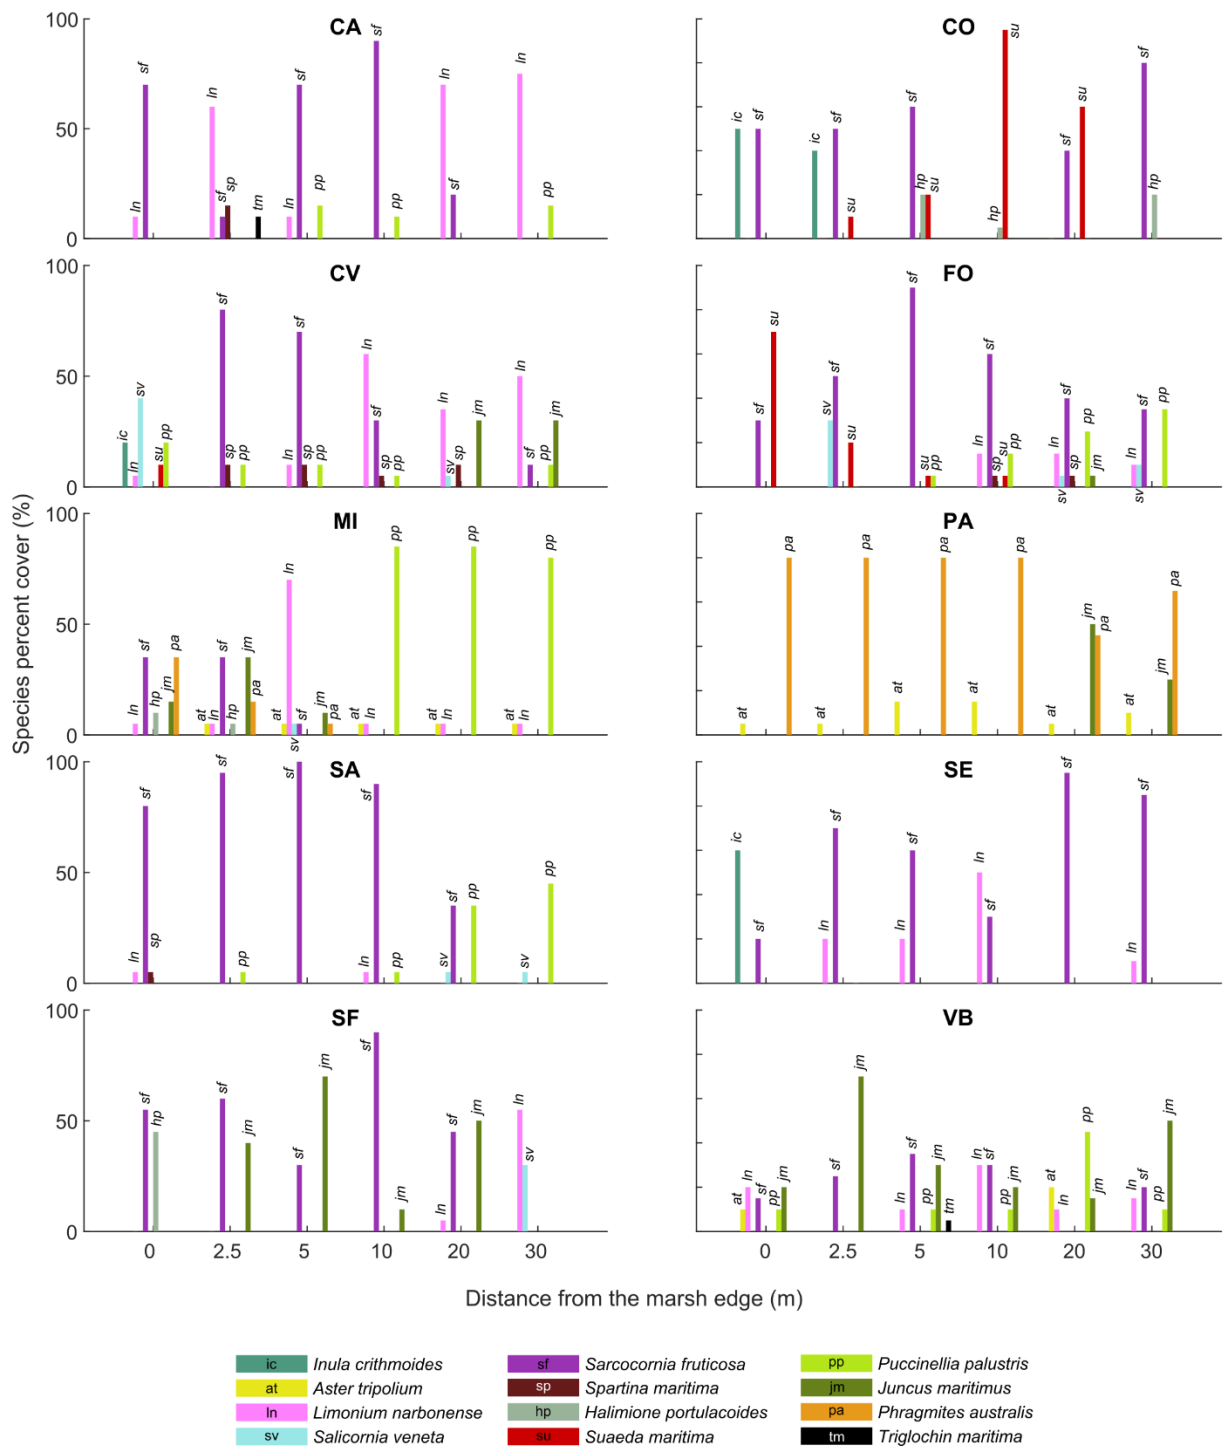

Figure S 1. Species percent cover observed within each 1 x 1 m quadrat surveyed for vegetation characteristics at each study transect.

| Species                        | Aboveground biomass (g m <sup>-2</sup> ) | Belowground biomass (g m <sup>-2</sup> ) | Source | Notes                                                                         |
|--------------------------------|------------------------------------------|------------------------------------------|--------|-------------------------------------------------------------------------------|
| <i>Inula crithmoides</i>       | 366                                      |                                          | 1      | Study for agricultural purposes, Lebanon.                                     |
| <i>Aster tripolium</i>         | 545                                      |                                          | 2      | Vegetation data from the Venice lagoon.                                       |
| <i>Limonium narbonense</i>     | 276.3                                    |                                          | 3      | Max live plant biomass as dry weight. Vegetation data from the Venice lagoon. |
| <i>Salicornia veneta</i>       | 657.7                                    |                                          | 3      | Max live plant biomass as dry weight. Vegetation data from the Venice lagoon. |
| <i>Sarcocornia fruticosa</i>   | 1296.7                                   | 4314                                     | 3, 4   | Max live plant biomass as dry weight. Vegetation data from the Venice lagoon. |
| <i>Spartina maritima</i>       | 370.7                                    |                                          | 3      | Max live plant biomass as dry weight. Vegetation data from the Venice lagoon. |
| <i>Halimione portulacoides</i> | 1540.7                                   |                                          | 3      | Max live plant biomass as dry weight. Vegetation data from the Venice lagoon. |
| <i>Suaeda maritima</i>         | 135.42                                   |                                          | 5      | Frazergaunge and Bali island of Indian Sundarbans.                            |
| <i>Puccinellia palustris</i>   | 372.7                                    |                                          | 3      | Max live plant biomass as dry weight. Vegetation data from the Venice lagoon. |
| <i>Juncus maritimus</i>        | 601.3                                    |                                          | 3      | Max live plant biomass as dry weight. Vegetation data from the Venice lagoon. |
| <i>Phragmites australis</i>    | 900                                      | 5600                                     | 2, 4   | Max live plant biomass as dry weight. Vegetation data from the Venice lagoon. |

**Table S 4. Literature data on vegetation biomass (dry weight g m<sup>-2</sup>) for species found in our study area, primarily focusing on aboveground biomass from studies conducted within or possibly near the Venice Lagoon. Belowground biomass is included where available. 1 = Zurayk and Baalbaki (1996); 2 = Ingegnoli and Giglio (2004); 3 = Scarton (2006); 4 = Scarton et al. (2002); 5 = Das et al. (2015).**

### S 3. Water salinity

| <b>Study site</b> | <b>ARPAV station</b> | <b>Mean salinity<br/>(PSU)</b> | <b>Standard<br/>deviation</b> |
|-------------------|----------------------|--------------------------------|-------------------------------|
| <b>CA</b>         | PNC1_7B              | 30.45                          | 2.94                          |
| <b>CO</b>         | ENC1_3               | 30.95                          | 2.72                          |
| <b>CV</b>         | ENC1_4               | 32.38                          | 2.02                          |
| <b>FO</b>         | ENC1_VS/PC2_16B      | 29.81                          | 3.80                          |
| <b>MI</b>         | PC4_10B              | 24.6                           | 5.45                          |
| <b>PA</b>         | PC1_1B/PNC2_2        | 24.29                          | 1.03                          |
| <b>SA SF</b>      | EC_Ve8               | 32.16                          | 2.30                          |
| <b>SE</b>         | PNC2_SG              | 31.21                          | 2.40                          |
| <b>VB</b>         | PC3_VDB              | 30.57                          | 2.57                          |

**Table S 5. Values of water salinity for each study area as the last-6-years mean (2016-2022) of the quarterly measurements from the CTD multiparameter probes of the Veneto Region Environmental Protection Agency (ARPAV).**

### S 4. References

Das, S., Zaman, S., Pramanick, P., Pal, N., and Mitra, A.: Suaeda Maritima : A Potential Carbon Reservoir of Coastal Zone, *Int. Adv. Res. J. Sci. Eng. Technol.*, 2, 61–65, <https://doi.org/10.17148/IARJSET.2015.2512>, 2015.

Ingegnoli, V. and Giglio, E.: Proposal of a new method of ecological evaluation of vegetation: The case study of the vegetation of the Venice lagoon landscape and of its salt marshes, *Ann. di Bot.*, 4, 95–114, 2004.

Scarton, F.: Produttività primaria epigea di sette alofite in laguna di Venezia, *Boll. del Mus. Civ. di Stor. Nat. di Venezia*, 57, 53–71, 2006.

Scarton, F., Day, J. W., and Rismondo, A.: Primary production and decomposition of *Sarcocornia fruticosa* (L.) scott and *Phragmites australis* Trin. Ex Steudel in the Po Delta, Italy, *Estuaries*, 25, 325–336, <https://doi.org/10.1007/BF02695977>, 2002.

Zurayk, R. A. and Baalbaki, R.: *Inula crithmoides*: A candidate plant for saline agriculture, *Arid Soil Res. Rehabil.*, 10, 213–223, <https://doi.org/10.1080/15324989609381436>, 1996.
